# Supplementary material
Source: PubMed Central journal article supplement (PMC4836719)
Supplement: supp_jiu814_jiu814supp.pdf [file supp_jiu814_jiu814supp.pdf]

Supplementary Table: Antigens tested in ELISpot assay

|                  | <b>Protein</b>                                                         | <b>Evidence for T cell immunogenicity</b>                                                         | <b>Biological Significance</b>                                                           |
|------------------|------------------------------------------------------------------------|---------------------------------------------------------------------------------------------------|------------------------------------------------------------------------------------------|
| Pre-erythrocytic | Circumsporozoite protein (CSP)                                         | Major surface protein of sporozoite; protective in mice, humans [1-4]; basis for RTS,S            | Most abundant Ag on sporozoite surface, involved in binding & invasion of hepatocytes    |
|                  | Thrombospondin-related anonymous protein (TRAP)                        | Correlate of human protection[5]; protective vaccine immunity in humans[6], mice[7]               | Located on the sporozoite, involved in gliding motility and hepatic invasion             |
|                  | Liver stage antigen 1 (LSA1)                                           | Correlate of T cell protection in mouse adoptive transfer experiments[8]                          | Synthesis begins at hepatocyte invasion and increases throughout liver cycle[8]          |
|                  | Cell traversal protein for ookinetes and sporozoites (CeTOS; PFL0800c) | Recognized by 100% of tested human volunteers vaccinated with irradi spz [9]                      | Abundant sporozoite protein localized to micronemes, key for infectivity[10]             |
|                  | Sporozoite invasion-associated protein 1 (SIAP-1; PFD0425w)            | Highly immunogenic in humans vaccinated w/ irradiated sporozoites[9]                              | Conserved sporozoite surface protein, implicated in hepatic invasion[9, 11, 12]          |
|                  | Sporozoite invasion-associated protein 2 (SIAP-2; PF08_0005)           | Immunogenic in mice                                                                               | Conserved sporozoite surface protein, implicated in hepatic invasion [9, 11]             |
|                  | p52 (PFD0215c)                                                         | Immunogenic in mice                                                                               | Upregulated in sporozoite; mutants attenuate at liver stage, confer sterile immunity[13] |
| Bloodstage       | Apical membrane antigen 1 (AMA1)                                       | Polyfunctional responses induced by vaccination in humans[14]                                     | On merozoite surface, involved in RBC invasion; also pre-erythrocytic expression         |
|                  | Merozoite surface protein 1 <sub>42</sub> (MSP1 <sub>42</sub> )        | Correlate of human protection [15]; Memory CD4 responses generated in half of human vaccinees[16] | Expressed on the surface of merozoites, involved in erythrocyte invasion                 |
|                  | Hypoxanthine guanine xanthine phosphoribosyl transferase (HGXPRT)      | Correlate of protection in P. yoelii[17]; recognized in acute malaria[18]                         | Purine salvage enzyme, highly conserved among Plasmodia                                  |

1. Reece WH, Pinder M, Gothard PK, et al. A CD4(+) T-cell immune response to a conserved epitope in the circumsporozoite protein correlates with protection from natural *Plasmodium falciparum* infection and disease. *Nat Med* **2004**; 10:406-10.
2. Hoffman SL, Oster CN, Mason C, et al. Human lymphocyte proliferative response to a sporozoite T cell epitope correlates with resistance to *falciparum* malaria. *J Immunol* **1989**; 142:1299-303.
3. Riley EM, Allen SJ, Bennett S, et al. Recognition of dominant T cell-stimulating epitopes from the circumsporozoite protein of *Plasmodium falciparum* and relationship to malaria morbidity in Gambian children. *Trans R Soc Trop Med Hyg* **1990**; 84:648-57.
4. Kumar KA, Sano G, Boscardin S, et al. The circumsporozoite protein is an immunodominant protective antigen in irradiated sporozoites. *Nature* **2006**; 444:937-40.
5. Todryk SM, Bejon P, Mwangi T, et al. Correlation of memory T cell responses against TRAP with protection from clinical malaria, and CD4 CD25 high T cells with susceptibility in Kenyans. *PLoS ONE* **2008**; 3:e2027.
6. Hill AV. Pre-erythrocytic malaria vaccines: towards greater efficacy. *Nat Rev Immunol* **2006**; 6:21-32.
7. Khusmith S, Charoenvit Y, Kumar S, Sedegah M, Beaudoin RL, Hoffman SL. Protection against malaria by vaccination with sporozoite surface protein 2 plus CS protein. *Science* **1991**; 252:715-8.
8. Kurtis JD, Hollingdale MR, Luty AJ, Lanar DE, Krzych U, Duffy PE. Pre-erythrocytic immunity to *Plasmodium falciparum*: the case for an LSA-1 vaccine. *Trends Parasitol* **2001**; 17:219-23.

9. Doolan DL, Southwood S, Freilich DA, et al. Identification of *Plasmodium falciparum* antigens by antigenic analysis of genomic and proteomic data. *Proc Natl Acad Sci U S A* **2003**; 100:9952-7.
10. Kariu T, Ishino T, Yano K, Chinzei Y, Yuda M. CelTOS, a novel malarial protein that mediates transmission to mosquito and vertebrate hosts. *Mol Microbiol* **2006**; 59:1369-79.
11. Speake C, Duffy PE. Antigens for pre-erythrocytic malaria vaccines: building on success. *Parasite Immunol* **2009**; 31:539-46.
12. Engelmann S, Silvie O, Matuschewski K. Disruption of *Plasmodium* sporozoite transmission by depletion of sporozoite invasion-associated protein 1. *Eukaryot Cell* **2009**; 8:640-8.
13. van Schaijk BC, Janse CJ, van Gemert GJ, et al. Gene disruption of *Plasmodium falciparum* p52 results in attenuation of malaria liver stage development in cultured primary human hepatocytes. *PLoS ONE* **2008**; 3:e3549.
14. Huaman MC, Mullen GE, Long CA, Mahanty S. *Plasmodium falciparum* apical membrane antigen 1 vaccine elicits multifunctional CD4 cytokine-producing and memory T cells. *Vaccine* **2009**; 27:5239-46.
15. Moormann AM, Sumba PO, Chelimo K, et al. Humoral and Cellular Immunity to *Plasmodium falciparum* Merozoite Surface Protein 1 and Protection From Infection With Blood-Stage Parasites. *J Infect Dis* **2013**; 208:149-58.
16. Huaman MC, Martin LB, Malkin E, et al. Ex vivo cytokine and memory T cell responses to the 42-kDa fragment of *Plasmodium falciparum* merozoite surface protein-1 in vaccinated volunteers. *J Immunol* **2008**; 180:1451-61.

17. Makobongo MO, Riding G, Xu H, et al. The purine salvage enzyme hypoxanthine guanine xanthine phosphoribosyl transferase is a major target antigen for cell-mediated immunity to malaria. *Proc Natl Acad Sci U S A* **2003**; 100:2628-33.

18. Woodberry T, Pinzon-Charry A, Piera KA, et al. Human T cell recognition of the blood stage antigen Plasmodium hypoxanthine guanine xanthine phosphoribosyl transferase (HGXPRT) in acute malaria. *Malar J* **2009**; 8:122.

**Supplementary Figure:** Trial profile. Shown are ELISpots performed at each timepoint

Randomization at age 6 mos

No chemoprevention  
n=98

12-16 months  
75/93

20 months  
81/90

24 months  
87/90

28 months  
82/88

32-36 months  
76/87

Monthly DP  
n=98

12-16 months  
72/92

20 months  
74/88

24 months  
82/87

28 months  
78/87

32-36 months  
83/85

Intervention  
Period
